1 **Role of African swine fever virus (ASFV) proteins EP153R and EP402R in reducing viral**  
2 **persistence and virulence from attenuated Benin $\Delta$ DP148R**

3  
4 **Authors:** Vlad Petrovan<sup>1#</sup>, Anusyah Rathakrishnan<sup>1#</sup>, Muneeb Islam<sup>1</sup>, Lynnette C. Goatley<sup>1</sup>,  
5 Katy Moffat<sup>1</sup>, Pedro J. Sanchez-Cordon<sup>1,2</sup>, Ana L. Reis<sup>1\*</sup>, Linda K. Dixon<sup>1\*</sup>

6  
7 # VP and AR are joint first authors

8 \*Corresponding authors: ana.reis@pirbright.ac.uk (ALR); linda.dixon@pirbright.ac.uk (LKD)

9  
10 <sup>1</sup> The Pirbright Institute, Ash Road, Pirbright, Woking, Surrey GU24 0NF, UK

11 <sup>2</sup> Current address: Centro de Investigación en Sanidad Animal (CISA-INIA), Carretera Algete-El  
12 Casa Km. 8,1, 28130, Valdeolmos, Madrid, Spain.

13  
14  
15 **Abstract:** The limited knowledge on the role of many of the approximately 170 proteins encoded  
16 by African swine fever virus restricts progress towards vaccine development. In this study we  
17 investigated the effect of deleting combinations of different genes from a previously attenuated  
18 virus, Benin $\Delta$ DP148R on: virus replication in macrophages, virus persistence and clinical signs  
19 post immunization, and induction of protection against challenge. Deletion of either EP402R or  
20 EP153R genes individually or in combination from Benin $\Delta$ DP148R did not reduce virus  
21 replication *in vitro*. However, deletion of EP402R dramatically reduced viral persistence *in vivo*,  
22 whilst maintaining high levels of protection against challenge. The additional deletion of EP153R  
23 (Benin $\Delta$ DP148R $\Delta$ EP153R $\Delta$ EP402R) further attenuated the virus and no viremia or clinical signs  
24 were observed post immunization. This was associated with decreased protection and detection of  
25 moderate levels of challenge virus in blood. Interestingly, the deletion of EP153R alone from  
26 Benin $\Delta$ DP148R did not result in further virus attenuation and a slight increase in virus genome  
27 copies in blood was observed at different times post immunization when compared with  
28 Benin $\Delta$ DP148R. These results show that EP402R and EP153R have a synergistic role in  
29 promoting viremia, however EP153R alone does not seem to have a major impact on virus levels  
30 in blood.

31

## 32 **Introduction**

33 African swine fever virus (ASFV) causes an acute hemorrhagic fever in domestic pigs and  
34 wild boar with case fatality approaching 100%. In contrast, its wildlife hosts in Africa, warthogs,  
35 bushpigs and soft ticks of *Ornithodoros* species that inhabit warthog burrows can be persistently  
36 infected, but show few disease signs (1, 2). ASF has a very high economic impact in affected  
37 countries, which now include most sub-Saharan Africa, parts of Russia, Eastern Europe and 11  
38 EU countries. The spread to China in 2018 and subsequent spread to South-East Asia resulted in  
39 death or culling of more than 7 million pigs and a decrease of the Chinese herd by about 40%  
40 ([http://www.fao.org/ag/againfo/programmes/en/empres/ASF/situation\\_update.html](http://www.fao.org/ag/againfo/programmes/en/empres/ASF/situation_update.html)). Since there  
41 are no vaccines or targeted therapeutics currently available, control relies on implementing strict  
42 biosafety and biosecurity measures.

43 ASFV is a large DNA virus with a linear double-stranded genome varying in size from 170  
44 to more than 190 kbp. The virus is the only member of the *Asfarviridae* family and has a  
45 predominantly cytoplasmic replication. The virus genome contains up to 167 genes including  
46 many that are not required for the virus to replicate in cells, but have roles in interactions with the  
47 host, to facilitate its survival and transmission (3). For example, the virus codes for several proteins  
48 that help the virus to evade the host innate immune response such as the type I interferon (IFN)  
49 response and apoptosis (4). Deletion of genes that inhibit type I IFN response, including members  
50 of the multigene families (MGF) 360 and 505 and DP96R (also designated UK) (5-10) can reduce  
51 the virulence of the virus in pigs, and induce an immune response to protect the animal against  
52 lethal challenge with a related virulent virus.

53 ASFV also codes for two transmembrane glycoproteins that are not essential for virus  
54 replication in cells, pEP402R (CD2v) and EP153R (11, 12). The EP402R gene codes for a type I  
55 transmembrane protein with similarity in its extracellular domain to the host CD2 protein. This  
56 virus protein pEP402R, also designated CD2v or CD2-like, is required for the binding of red blood  
57 cells to infected macrophages (haemadsorption or HAD) (13, 14). It is also presumed to cause  
58 binding of red blood cells to extracellular virions, as 95% of virus in blood from infected pigs was  
59 shown to be in the red blood cell fraction (15). The CD2v protein was also suggested to have a  
60 role in the ASFV induced inhibition of *in vitro* proliferation of lymphocytes in response to  
61 mitogens since deletion of the gene abrogated this effect (16). Interactions of proteins including  
62 SH3P7/mAbp1 and AP1 with the cytoplasmic tail were demonstrated, suggesting that these may

63 be involved in intracellular trafficking of the protein through the Golgi apparatus (17, 18). The  
64 CD2v protein is the only virus protein to be detected on the surface of extracellular virions (19).  
65 Interestingly, pigs immunized with a recombinant CD2v, expressed in baculovirus, showed  
66 reduced viremia after challenge with E75 isolate (20). Moreover, an involvement of cell mediated  
67 protection was suggested, since several T-cell epitopes were mapped using overlapping CD2v  
68 peptides (21).

69 The EP153R type II transmembrane protein contains a predicted C-type lectin domain. C-  
70 type lectins are Ca<sup>2+</sup>-dependent glycan-binding proteins that are involved in cell-cell adhesion  
71 playing key roles in both innate and adaptive immune responses. For example, C-Type Lectin  
72 Receptors (CLRs) are important for recognition and capture of pathogens as these pattern  
73 recognition receptors (PRRs) have a high affinity for their ligands, which results in internalization  
74 of the pathogens (22). The EP153R protein has been demonstrated to augment the HAD induced  
75 by the CD2v protein (23) and to have roles in inhibiting apoptosis mediated by the p53 pathway  
76 and in reducing the surface expression of swine leucocyte antigen I (SLAI) (24, 25).

77 Our previous experiments showed that deletion of the DP148R gene from the genome of  
78 the virulent Benin 97/1 genotype I isolate, attenuated the virus in pigs and induced high levels of  
79 protection against lethal challenge with parental virus (7). In pigs immunized with  
80 Benin $\Delta$ DP148R, a peak of viremia was detected in blood at 5- or 6-days post-infection, coincident  
81 with clinical signs. After this period, clinical signs were not observed, but virus genome in blood  
82 declined slowly over a period of about 60 days and infectious virus declined more rapidly and was  
83 not detected by about day 30 (7).

84 In our current study, we investigated the hypothesis that virus binding to red blood cells  
85 may prolong the persistence of virus in blood. Therefore, we deleted either EP402R, EP153R genes  
86 alone or in combination from the genome of the Benin $\Delta$ DP148R, and carried out immunization  
87 and challenge experiments in pigs. The results confirmed that deleting the EP402R gene reduced  
88 virus persistence in blood. Transient clinical signs and a peak of viremia were still observed post-  
89 immunization of pigs and high levels of protection were observed. Deletion of the EP153R gene  
90 from the Benin $\Delta$ DP148R $\Delta$ EP402R genome further attenuated the virus and no clinical signs or  
91 viremia were observed. However, deletion of EP153R from Benin $\Delta$ DP148R revealed a similar  
92 clinical outcome compared with Benin $\Delta$ DP148R. Interestingly levels of virus in blood were higher  
93 in Benin $\Delta$ DP148R $\Delta$ EP153R.

94 Overall, using a genetic backbone of a previously attenuated virus, we provided new  
95 insights into the role of the CD2v and EP153R proteins in virus virulence and persistence.

96

## 97 **Materials and methods**

### 98 **1. Viruses and cells**

99 The ASFV Benin 97/1 wild type and Benin $\Delta$ DP148R isolates have been described  
100 elsewhere (7, 26). Deletion mutant viruses were cultured in porcine bone marrow cells (PBM).  
101 Titration of wild type virus was carried out by haemadsorption assay (in which the results are  
102 presented as HAD<sub>50</sub>/ml) or end-point titers based on mNeonGreen or Tag-RFP-T markers and  
103 presented as TCID<sub>50</sub>/ml, calculated using Spearman and Karber formula.

104

### 105 **2. Construction of recombinant Benin $\Delta$ DP148R $\Delta$ EP402R, 106 **Benin $\Delta$ DP148R $\Delta$ EP153R $\Delta$ EP402R and Benin $\Delta$ DP148R $\Delta$ EP153R****

107

#### 108 **i. Transfer plasmids**

109 Transfer plasmid p $\Delta$ EP402R-VP72GUS was constructed by cloning amplified right and  
110 left regions of the Benin 97/1 flanking the EP402R gene into the previously published  
111 pLoxPVP72GUSLoxP vector (27).

112 Vector pLoxPVP30TagRFP-TLoxP was generated by first amplifying the TagRFP-T gene  
113 (28) with a forward primer containing *Bam*HI restriction site (*italic*) and the ASFV P30 promoter  
114 sequence (bold) (29) (5'-  
115 **GGATCCTTATTATTTTATAATTTTAAAATTGAATGGATTTTATTTTAAATATATCC**  
116 **ATGGTGTCTAAGGGCGAAGAGCT**) and a reverse primer containing a ASFV transcription  
117 termination signal (bold) (30) and *Eco*RI restriction site (*italic*) (5'-  
118 **GAATTCAAAAAAAAAACTTGTACAGCTCGTCCATGCCAT**). The TagRFP-T fluorescent  
119 marker was kindly provided by Dr. Chris Netherton (The Pirbright Institute, UK). The amplified  
120 product was then swapped with the VP72GUS cassette of pLoxPVP72GUSLoxP vector. Using  
121 this newly produced pLoxPVP30TagRFP-TLoxP, the left and flanking regions of DP148R were  
122 then cloned to produce transfer plasmid p $\Delta$ DP148R-VP30TagRFP-T.

123 The other transfer plasmids p $\Delta$ EP153R-VP30mNG and p $\Delta$ EP153R $\Delta$ EP402R-VP30mNG  
124 were synthesized commercially (Genscript, US). Plasmid p $\Delta$ EP153R-VP30mNG contains the left

125 and right flanking regions of EP153R, while p $\Delta$ EP153R $\Delta$ EP402R-VP30mNG contains the left  
126 flanking region of EP153R and the right flanking region of EP402R. In both plasmids, between  
127 the flanking regions, a reporter gene, mNeonGreen (mNG) under control of the ASFV VP30  
128 promoter flanked with LoxP sites was added (31).

129

130 ii. Homologous recombination and virus purification

131 Recombinant ASFV Benin $\Delta$ DP148R $\Delta$ EP402R was produced in a sequential 2 step  
132 deletion method. First, Benin $\Delta$ EP402R (Figure 1B) was produced by infecting primary porcine  
133 alveolar macrophages (PAM) with Benin 97/1 (Figure 1A) and then transfection with p $\Delta$ EP402R-  
134 VP72GUS using the TransIT-LT1 transfection reagent (Mirus Bio, USA). In the presence of X-  
135 Gluc, recombinant viruses expressing the GUS gene were identified and purified by multiple  
136 rounds of limiting dilutions. Next, using purified Benin $\Delta$ EP402R as parental virus, homologous  
137 recombination was undertaken with transfer plasmid p $\Delta$ DP148R-VP30TagRFP-T in wild boar  
138 lung cells (WSL-R). Cells expressing the TagRFP-T were identified via fluorescence activated cell  
139 sorting (FACS); single cells were isolated and cultured in individual wells of 96 well plates  
140 containing PBMs. The recombinant virus was subsequently purified by FACS using the method  
141 described by Rathakrishnan et al. (31). Similarly, to produce recombinants  
142 Benin $\Delta$ DP148R $\Delta$ EP153R (Figure 1C) and Benin $\Delta$ DP148R $\Delta$ EP153R $\Delta$ EP402R (Figure 1D),  
143 WSL-R cells were infected with the Benin $\Delta$ DP148R virus at a multiplicity of infection (MOI) of  
144 2 and transfected with the p $\Delta$ EP153R-VP30mNG or p $\Delta$ EP153R $\Delta$ EP402R-VP30mNG plasmids  
145 respectively using the TransIT-LT1 transfection reagent. Expression of mNeonGreen marker was  
146 monitored and recombinant viruses were isolated and purified by FACS and limiting dilution as  
147 described (31). Sequencing across the site of deletion confirmed the expected deletion and site of  
148 reporter gene insertion.

149

### 150 3. Growth curves

151 Viruses (Benin 97/1, Benin $\Delta$ DP148R, Benin $\Delta$ DP148R $\Delta$ EP402R,  
152 Benin $\Delta$ DP148R $\Delta$ EP153R $\Delta$ EP402R and Benin $\Delta$ DP148R $\Delta$ EP153R) were added to purified PBMs  
153 at a MOI of 0.01 in triplicate in 24 well plates. Cells and supernatants were collected at different  
154 times post-infection and subjected to 3 freeze-thaw cycles. Cellular debris was removed by

155 centrifugation, and virus titers were determined by the fluorescence assay or HAD, as described  
156 above. The experiment was carried out in purified PBMs from 2 different pigs.

157

#### 158 **4. Immunization and challenge of pigs**

159 Animal experiments were carried out in SAPO4 high containment animal housing at the  
160 Pirbright Institute according to regulated procedures from the Animals Act UK 1998 and  
161 conducted under Home Office License 7088520. Four separate experiments were undertaken. In  
162 experiment 1, 4 Large White X Landrace pigs (15-20kg) were immunized by the intramuscular  
163 route with  $10^3$  TCID<sub>50</sub> BeninΔDP148RΔEP402R and boosted by the same route with the same  
164 recombinant virus at  $10^4$  TCID<sub>50</sub> on day 20 post-immunization. In experiment 2, 8 pigs were  
165 immunized by the intramuscular route with  $10^4$  TCID<sub>50</sub> BeninΔDP148RΔEP153RΔEP402R and  
166 were boosted twice with the same virus at  $10^4$  TCID<sub>50</sub> on day 21 and at  $10^6$  TCID<sub>50</sub> on day 28 post-  
167 immunization. In experiment 3, 6 pigs were immunized by the intramuscular route with  $10^5$   
168 TCID<sub>50</sub> BeninΔDP148RΔEP153R and boosted with the same dose on day 21 post-immunization.  
169 In experiment 4, 6 pigs were immunized by the intramuscular route with  $10^5$  TCID<sub>50</sub>  
170 BeninΔDP148R and boosted with the same dose on day 21 post-immunization. Non-immunized  
171 control pigs and immunized pigs were challenged by the intramuscular route with either  $10^4$  (Exp.  
172 1, group E) or  $10^3$  (Exp. 2, group F, for Exp. 3, group L and for Exp. 4, group M) HAD<sub>50</sub> of the  
173 virulent Benin 97/1 isolate approximately 3 weeks after the boost (Figure 2). Pigs were euthanized  
174 at a moderate severity endpoint as defined in the project license PPL70/8852 from the UK Home  
175 Office.

176

#### 177 **5. Genome copies in blood**

178 DNA was extracted from whole blood using MagVet universal isolation kit (Life  
179 Technologies), at different days throughout the study. Samples were assayed in duplicate for the  
180 presence of viral DNA by qPCR on a Stratagene Mx3005P system (Agilent Technologies, Santa  
181 Clara, CA, USA) following a protocol modified (32) from using the primers Vp72 sense (CTG  
182 CTC ATG GTA TCA ATC TTA TCG A) and Vp72 antisense [GAT ACC ACA AGA TC(AG)  
183 GCC GT] and the probe 5'-(6-carboxyfluorescein [FAM])-CCA CGG GAG GAA TAC CAA CCC  
184 AGT G-3'-(6-carboxytetramethylrhodamine [TAMRA]) (32). A standard curve was prepared from



185 a p72 mimic plasmid by making serial dilution ranging from  $10^8$  to  $10^1$  copies/ml. Results were  
186 reported as  $\log_{10}$  genome copies/ml.

187

## 188 **6. Antibody responses**

189 The level of antibody responses against ASFV-p72 in serum was measured using a  
190 commercial blocking ELISA (INgezim PPA Compac, Ingenasa) following the manufacturer's  
191 instructions. The percentage of blocking (PB) was calculated using the following formula:  
192  $[(\text{negative-control OD} - \text{sample OD}) / (\text{negative-control OD} - \text{positive-control OD})] \times 100$ , where  
193 OD is optical density. Samples were considered positive if the PB was above the cut-off value of  
194 50% blocking.

195

## 196 **7. IFN gamma ELISpot assay**

197 Peripheral blood mononuclear cells (PBMC) were collected at 3 different time points  
198 including pre-immunization, pre-boost and pre-challenge. PBMC were purified from EDTA-  
199 blood tubes using Histopaque-1083 gradient medium. ELISpot plates were coated overnight at  
200  $4^{\circ}\text{C}$  with  $4 \mu\text{g/ml}$  IFN $\gamma$  monoclonal antibody (P2F6) in 0.05M carbonate-bicarbonate coating  
201 buffer. After incubation, plates were washed four times with phosphate-buffered saline (PBS).  
202 Cells were plated in duplicate at two different dilutions ( $8 \times 10^5$  and  $4 \times 10^5$  per well), in RPMI  
203 1640, Glutamax (Gibco) supplemented with 10% fetal bovine serum,  $50 \mu\text{M}$  2-mercaptoethanol,  
204  $100 \text{ IU/ml}$  penicillin, and  $100 \mu\text{g/ml}$  streptomycin. The cells were then incubated overnight at  $37^{\circ}\text{C}$   
205 in a final volume of  $200 \mu\text{l}$  with  $10^5 \text{ HAD}_{50}$  of Benin 97/1, an equivalent volume of mock  
206 inoculum, or  $20 \mu\text{g/ml}$  phytohemagglutinin as a positive control. Cells were lysed by incubation  
207 for 5 min in water and then washed with PBS. Following incubations with biotinylated anti-porcine  
208 IFN $\gamma$  monoclonal antibody (P2C11) and streptavidin conjugated to alkaline phosphatase, AP  
209 conjugate substrate kit (Bio-Rad) was used to develop spots. The spot forming cells were then  
210 counted using an ELISpot assay reader system (Immunospot, CTL). The number of spots per well  
211 was converted into the number of spots per million cells, and the mean for duplicate wells was  
212 plotted using GraphPad Prism 8 software. No cells were collected for pigs belonging to group D  
213 (Benin $\Delta$ DP148R).

214

215

## 216 **8. Statistical analysis**

217 Statistical analysis was performed using GraphPad Prism8 software. Two-way ANOVA followed  
218 by Sidak's multiple comparison test was used to evaluate differences between groups.

219

## 220 **Results**

### 221 **Generation of recombinant viruses**

#### 222 i. Benin $\Delta$ DP148R $\Delta$ EP402R

223 A two-step sequential deletion method was applied to produce the recombinant ASFV  
224 Benin $\Delta$ DP148R $\Delta$ EP402R (Figure 1B). In the first step, EP402R (Genome position: 67567 –  
225 68775) was deleted from the virulent Benin 97/1 isolate (Figure 1A) using homologous  
226 recombination. This virus, Benin $\Delta$ EP402R was subsequently cultured and used in the second step  
227 to construct recombinant ASFV Benin $\Delta$ DP148R $\Delta$ EP402R.

228 Using a single cell isolation method for producing recombinant ASFV (31), the second  
229 step in the production of Benin $\Delta$ DP148R $\Delta$ EP402R involved the inclusion of a fluorescent reporter  
230 gene TagRFP-T in place of the deleted DP148R gene. Using FACS, single cells expressing the  
231 TagRFP-T reporter were isolated and the recombinant virus was purified with a combination of  
232 single cell isolation and limiting dilutions.

233

#### 234 ii. Benin $\Delta$ DP148R $\Delta$ EP153R $\Delta$ EP402R and Benin $\Delta$ DP148R $\Delta$ EP153R

235 A similar approach of single infected cell isolation and purification was used to generate  
236 recombinant ASFV Benin $\Delta$ DP148R $\Delta$ EP153R and Benin $\Delta$ DP148R $\Delta$ EP153R $\Delta$ EP402R in which  
237 the either EP153R (genome position: 67051 - 67491) alone was deleted from Benin $\Delta$ DP148R or  
238 both genes EP153R and EP402R (genome position: 67051 – 68775) were deleted simultaneously.  
239 These gene(s) were replaced by mNeonGreen under the control of VP30 promoter in the attenuated  
240 Benin $\Delta$ DP148R virus (7) (Figures 1C and 1D). In both viruses, 21bp at the 5' end of EP153R was  
241 left in the recombinant viruses because this stretch of sequence may contain the termination signal  
242 for the adjacent EP152R gene (33). The expected deletions of genes in the recombinant virus were  
243 confirmed via PCR analysis and Sanger sequencing. The purified recombinant virus stock was  
244 propagated on PBMs and titrations were performed in quadruplicate on PBMs collected from  
245 different pigs.

246



## 247 **Growth curves**

248 Porcine bone marrow cells were infected with the Benin 97/1, Benin $\Delta$ DP148R,  
249 Benin $\Delta$ DP148R $\Delta$ EP402R, Benin $\Delta$ DP148R $\Delta$ EP153R $\Delta$ EP402R and Benin $\Delta$ DP148R $\Delta$ EP153R at  
250 a MOI of 0.01 to determine if deletion of the genes affected the ability of the virus to replicate *in*  
251 *vitro*. At different days post infection (1, 2, 3, 4, 5), total virus harvested from cells and supernatant  
252 was titrated. The results showed no significant difference between the kinetics and the levels of  
253 virus replication of the recombinant viruses and parental Benin 97/1 isolate (Figure 3). Virus titers  
254 reached a plateau of approximately  $10^7$  TCID<sub>50</sub>/ml between 24 and 48 h post infection and were  
255 maintained for the remainder of the culture time. The results show that deletion of the DP148R,  
256 EP153R, EP402R or EP153R and EP402R gene did not significantly alter the ability of the virus  
257 to replicate in culture.

258

## 259 **Immunization, challenge and clinical observations**

260 Four groups of pigs were immunized intra-muscularly (IM) in separate experiments with  
261 1 ml of either  $10^3$  TCID<sub>50</sub> Benin $\Delta$ DP148R $\Delta$ EP402R (Group A),  $10^4$  TCID<sub>50</sub>  
262 Benin $\Delta$ DP148R $\Delta$ EP153R $\Delta$ EP402R (Group B),  $10^5$  TCID<sub>50</sub> Benin $\Delta$ DP148R $\Delta$ EP153R (Group C)  
263 and  $10^5$  TCID<sub>50</sub> Benin $\Delta$ DP148R (Group D). Pigs in all four groups were boosted with the same  
264 recombinant virus (with either  $10^4$  for groups A and B or  $10^5$  for groups C and D) approximately  
265 3 weeks post immunization (see Figure 2). In Group B, an additional boost with  $10^6$  TCID<sub>50</sub> was  
266 performed as measurement of cellular responses at day 21 indicated low levels of ASFV specific  
267 IFN $\gamma$  producing cells had been induced (see Figure 9). Naïve, non-vaccinated pigs, (Groups E, F,  
268 L and M) served as controls for the challenge with the virulent Benin 97/1 isolate. Groups A and  
269 E were challenged intramuscularly at 42 dpi with  $10^4$  HAD<sub>50</sub> in 1 ml while Group B and Group F  
270 were challenged at 45 dpi with  $10^3$  HAD<sub>50</sub> in 1 ml with virulent Benin 97/1 virus (Figure 2). One  
271 pig in Group A was euthanized at day 9 post-immunization due to a non-ASFV specific condition.  
272 Groups C and L were challenged at 39 dpi, whereas groups D and M were challenged at 42 dpi.

273 Rectal temperatures and clinical scores (34) were recorded daily for all pigs (Figures 4 and  
274 5). Pigs in Group A (Benin $\Delta$ DP148R $\Delta$ EP402R) had transient increased temperatures above 40.5°C  
275 for 2 days after day 5 post-immunization (Figure 4A). This was accompanied by reduced appetite  
276 and lethargy (Figure 5A). Pig A1 had a temperature between 40 and 40.5 for 3 days (6, 7 and 9)  
277 and one day above 41 (day 8 - 41.2). A2 had a temperature at 41 or above for 2 days (6 and 8) and

278 a temperature 40.3 on day 7. Pig A3 had a temperature of 40.6 on day 5 and 40.0 on day 6. One  
279 pig, A4, had a temperature of 40.4 on day 6, 40.8 on days 7 and 8 and 40.0 on day 9. This pig  
280 vomited blood and was euthanized on day 9 post-immunization. Post-mortem examination showed  
281 the pig had a stomach ulcer which was not suspected to be directly related to ASFV infection. No  
282 further clinical signs were observed post-immunization in the remaining pigs even after challenge.  
283 As expected, the non-immunized control pigs in Group E developed clinical signs associated with  
284 acute ASF after challenge. These signs included an increase in temperature (40.6 – 41.6°C), not  
285 eating and lethargy on day 3 post-challenge (Figures 4A and 5A). Pig E2 was also vomiting on  
286 day 4 post-challenge. All 3 pigs were culled on day 4 post-challenge at the moderate severity  
287 humane endpoint.

288 In Group B (Benin $\Delta$ DP148R $\Delta$ EP153R $\Delta$ EP402R) no increase in temperature or other  
289 clinical signs were observed in any of the pigs before challenge. After challenge an increase in  
290 temperature at or above 41°C was observed in one pig at 3 days post-challenge and in the remaining  
291 pigs at day 4 post-challenge (Figure 4B). Pigs B3 and B4 also had breathing difficulties on day 5  
292 post-challenge, reaching the humane endpoint and were euthanized (Figure 5B). The remaining 4  
293 pigs had an increased temperature above 40.5°C for two days in total, except for pig B7 which had  
294 a temperature of 40.6°C which persisted for 3 days (Figure 4B). Non-immune pigs in group F also  
295 developed clinical signs at between day 2- and 4 post-challenge, including an increase in  
296 temperatures (40.3 – 41.9°C), were not eating and were lethargic (Figures 4B and 5B). At day 6  
297 post-challenge, Pig F2 had hemorrhagic lesions at the periphery of the ears while Pig F3 had traces  
298 of blood in its feces. On days 4 to 6 post-challenge all pigs were euthanized at the moderate severity  
299 humane endpoint.

300 In Group C (Benin $\Delta$ DP148R $\Delta$ EP153R), moderate clinical signs were observed after  
301 immunization, comparable with group D (Benin $\Delta$ DP148R), with increased temperatures above  
302 40.5°C for one or two days between days 3 to 6. However, after challenge none of the pigs from  
303 either of the groups showed any clinical signs or temperatures (Figures 4C, 4D, 5C and 5D). In  
304 clear contrast, control pig L3 health status deteriorated quickly starting from day 3 post challenge,  
305 with a raise in rectal temperature above 41.5°C at day 4 post challenge. Pig L3 was euthanized at  
306 day 5 post challenge and the rest of the group reached the humane end point at day 6 post challenge  
307 due to increased temperatures (41.2 – 41.5 °C) and rapid manifestation of clinical signs including  
308 lethargy and refusal to eat (Figures 4C and 5C).

309 In group D (Benin $\Delta$ DP148R), pigs D1, D2 and D3 had increased temperatures at day 2  
310 post-immunization, with temperatures ranging from 40.6 to 41°C. Pigs D4 and D5 showed  
311 increased temperatures on day 4, but these dropped on the following day (Figure 4D). No  
312 temperatures or clinical signs were present after boost or challenge in this group (Figures 4D and  
313 5D). Control pigs from group M showed clinical signs including increased temperature lethargy  
314 and reduced appetite or refusal to eat from day 2 or 3 post challenge all were euthanized at day 4  
315 or 5 post challenge (Figure 4D and 5D).

316

### 317 **Post mortem pathological observations**

318 Pigs in Group A, immunized with Benin $\Delta$ DP148R $\Delta$ EP402R, showed few macroscopic  
319 lesions, with the exception of the slight enlargement of lymph nodes. Pig A4, was euthanized due  
320 to welfare reasons before challenge (Figure 6). In Group B, immunized with  
321 Benin $\Delta$ DP148R $\Delta$ EP153R $\Delta$ EP402R, the pigs culled at humane end points (B3, B4) had higher  
322 macroscopic lesion scores than those which survived but lower than the control pigs. Pigs B3 and  
323 B4 had ascites, moderate/partial hyperemic splenomegaly, several enlarged lymph nodes and  
324 hemorrhagic renal lymph nodes. Three surviving pigs (B1, B7 and B8) had enlarged lymph nodes  
325 while the other two (B2, B5) were free of any ASFV typical lesions (Figure 6). In group C,  
326 immunized with Benin $\Delta$ DP148R $\Delta$ EP153R, pigs C1 and C2 showed enlarged spleens and minimal  
327 hemorrhages on the lymph nodes (renal and gastro hepatic) (Figure 6). Similar findings were  
328 reported in group D (Benin $\Delta$ DP148R), where pigs D3, D4, D5 had enlarged lymph nodes, and pig  
329 D2 had an enlarged spleen and pericardial effusion (Figure 6). All control pigs belonging to groups  
330 E, F, L and M presented lesions consistent with acute ASF, represented by enlarged and  
331 hemorrhagic lymph nodes, erythematous tonsils, pericardial effusions, enlarged spleens, and  
332 ascites.

333

### 334 **Genome copies in blood**

335 Levels of virus genome in blood were measured by qPCR. At 5- or 6-days post-  
336 immunization 3 pigs in Group A, (Benin $\Delta$ DP148R $\Delta$ EP402R) had moderate levels of virus in blood  
337 (approximately  $10^6$  genome copies/ml) coinciding with the onset of clinical signs, whereas pig A3  
338 only had low levels of virus (approximately  $10^3$  genome copies/ml) (Figure 7A). Virus levels

339 decreased after day 6 post-immunization and no pigs had detectable virus after boost and  
340 challenge.

341 No virus genome was detected in blood from pigs in Group B  
342 (Benin $\Delta$ DP148R $\Delta$ EP153R $\Delta$ EP402R) before challenge (Figure 7B). After challenge variable  
343 levels of genome were detected from day 3 or 4 post-challenge. Maximum levels were detected in  
344 pigs B3 and B4, which reached the humane endpoint (approx.  $10^6$  genome copies per ml). In the  
345 surviving 6 pigs the maximum levels detected varied between  $\sim 10^2$  and  $10^{5.5}$  genome copies/ml.  
346 Levels of virus genome decreased until termination at day 20 post-challenge becoming  
347 undetectable in 2 pigs and reduced to  $10^{2.6}$  in others except 1 pig where levels remained at  $10^{4.5}$  at  
348 termination.

349 Pigs belonging to groups C (Benin $\Delta$ DP148R $\Delta$ EP153R) and D (Benin $\Delta$ DP148R) had  
350 higher levels of genome copies in blood (approx.  $10^6$ - $10^7$  genome copies/ml) following  
351 immunization, these levels decreased to approx.  $10^4$  genome copies/ml by the end of the study  
352 (day 60) (Figures 7C and 7D). Interestingly levels of copies in blood were significantly higher at  
353 day 10 post immunization ( $p < 0.01$ ) for group C compared with group D and this difference  
354 persisted throughout the study ( $p < 0.1$  at days 14, 28, 39/40 and 49 post immunization) (Figure 8).

355

### 356 **IFN-gamma ELISpot assay**

357 The responses of PBMCs from immunized pigs to ASFV were measured at different times  
358 post-immunization by IFN- $\gamma$  ELISpot. An ASFV specific response was not detected before  
359 immunization in any group of pigs. Very high numbers of IFN- $\gamma$  producing cells ( $\sim 725 - 1225$   
360 spots per million cells) were induced in all pigs in Group A before boost, which then decreased  
361 before challenge to levels ranging from 178 - 463 spots/million cells (Figure 9A). In contrast, for  
362 Group B, low levels of IFN- $\gamma$  producing cells were induced after immunization and before the first  
363 boost. Hence, a second boost with higher dose of the same virus was applied 4 weeks post  
364 immunization and the number of IFN- $\gamma$  producing cells increased uniformly in all pigs before  
365 challenge (326 - 540 spots/million PBMCs) (Figure 9B). Of note, pigs B3 and B4 that were  
366 euthanized at 5 dpc had 540 and 458 spots/million PBMC. Pigs in group C showed a relatively  
367 lower number of IFN  $\gamma$  producing cells before boost, with pig C2 showing a higher response of  
368  $\sim 305$  spots/million PBMCs, compared with other pigs of this group. Surprisingly, levels decreased  
369 after the boost and only one pig (C5) had a higher number of IFN- $\gamma$  secreting cells (135 - 126

370 spots/million PBMCs) at challenge compared with before boost (Figure 9C). The number of IFN-  
371  $\gamma$  producing cells were significantly higher in group A compared with groups B and C before boost.  
372 At challenge, both groups A and B showed significantly higher number of IFN- $\gamma$  producing cells  
373 than Group C (Figure 9D).

374

### 375 **Antibody responses**

376 Antibody responses to ASFV p72 capsid protein were measured using a commercially  
377 available blocking ELISA. As expected, an antibody response was detected in all pigs in Group A  
378 by day 14 and increased after boost (Figure 10A). In contrast, pigs in Group B mounted a slower  
379 antibody response, which was first detected at day 27 post-immunization after the first boost and  
380 just before the second boost. Levels were maintained for the rest of the experiment (Figure 10B).  
381 A faster antibody response was seen in group C, where most of the pigs had detectable antibody  
382 by day 7, and on day 14 all were above the cut-off (Figure 10C). For group D, a general trend was  
383 observed in generating an antibody response at day 10 (Figure 10D).

384

### 385 **Discussion**

386 Targeted deletions of non-essential genes from the ASFV genome have been used  
387 successfully to construct candidate live attenuated vaccine strains and to understand the role of the  
388 genes during infection of cells and pigs. A vaccine candidate with an acceptable safety profile  
389 should have reduced clinical signs and vaccine virus persistence post-immunization but retain high  
390 levels of protection.

391 One of the potential candidates for targeted deletions represents the EP402R gene which  
392 codes for the CD2v protein, since it is required for the binding of infected cells or viral particles  
393 to red blood cells, thus playing an important role in viral dissemination in different tissues in pigs.  
394 During the sylvatic cycle, in ticks, the binding of the virus to red blood cells probably helps  
395 retention of the virus with the blood meal and also crossing the midgut barrier (35). Deletion of  
396 the EP402R gene from the genome of virulent viruses Malawi Lil20/1 (genotype VIII) (16) and  
397 Georgia/07 (genotype II) (12) did not reduce the virulence of these viruses in pigs. Surprisingly,  
398 deletion of this gene from a genotype I virulent isolate, BA71, reduced the virus virulence and  
399 induced protection against lethal challenge with the parental virus and also against the genotype II  
400 Georgia/07 isolate (36). Recent studies have shown that deletion of an additional virulence marker

401 such as UK (DP96R) gene resulted attenuation in pigs, conferring 100% protection after challenge  
402 with an Asian strain belonging to genotype II (ASFV-SY18), however viral DNA was still present  
403 in different lymphoid organs (37). Deletion of the EP153R gene from the genome of a virulent  
404 isolate, Malawi Lil20/1, failed to reduce virulence of the virus for pigs (38). Both the EP402R and  
405 EP153R genes are interrupted in the genomes of the naturally attenuated isolates OURT88/3 and  
406 NH/P68 (26, 39). However, the role of these gene interruptions in virus virulence is unclear since  
407 OURT88/3 and NH/P68 viruses also have large deletion of multiple genes belonging to MGF 360  
408 and MGF 505 from close to the left genome end (26, 40). Both the single deletion of EP402R and  
409 the simultaneous deletion of EP402R and EP153R from an attenuated Georgia/07 strain (ASFV-  
410 G-Δ9GL) decreased the ability to protect against challenge (41). Serum antibodies against both  
411 CD2v and EP153R were shown to mediate haemadsorption inhibition and to be involved in  
412 serotype-specific protective immunity, representing good targets for ASFV serotype classification  
413 and evolution (42, 43).

414 Our approach to reduce the virus persistence and clinical signs post-immunization of pigs  
415 with BeninΔDP148R (7), was to remove either EP402R or EP153R genes singly, or in combination  
416 from the BeninΔDP148R attenuated virus. Our results showed that immunization of pigs with the  
417 virus BeninΔDP148RΔEP402R resulted in a dramatically shorter virus persistence compared to  
418 BeninΔDP148R, with virus genome in blood detected only until day 14 post-immunization  
419 compared with more than 60 days in pigs immunized with BeninΔDP148R (Figure 7A and 7D).  
420 Moreover, no viremia was detected after the second boost or after challenge, confirming our  
421 hypothesis that CD2v can play a role in viral persistence. However, since the immunized pigs still  
422 displayed significant clinical signs post immunization, it is also an indicator that the virus might  
423 be disseminated by another route.

424 We were surprised that deleting the EP402R gene did not have a greater effect on reducing  
425 clinical signs post-immunization since attenuation was observed when this gene was singly deleted  
426 from the virulent BA71 virus, another Genotype I isolate (36). In order to try to further increase  
427 the safety profile of BeninΔDP148RΔEP402R, we decided to also remove the EP153R gene,  
428 which is adjacent to EP402R (26). This gene codes for a type II membrane protein containing a C-  
429 type lectin domain similar to those in host proteins. The EP153R protein has been shown to have  
430 diverse roles, including increasing the binding of red blood cells to ASFV infected cells, inhibition  
431 of cell surface expression of SLA-I (porcine MHC class I) and inhibition of apoptosis (23-25). It



432 was also shown that together with CD2v, EP153R can contribute to mediating the cross-protective  
433 serotype specific immunity (43).

434 After immunization with Benin $\Delta$ DP148R $\Delta$ EP153R $\Delta$ EP402R (Group B), pigs did not  
435 show any clinical signs or viremia before challenge (Figures 4B, 5B, 7B). However, when we  
436 deleted EP402R or EP153R singly, elevated clinical signs were observed after immunization. This  
437 could be explained if the proteins act synergistically, thus the deletion of both genes reduces the  
438 viral load to an extent that the innate immune response can suppress the initial steps of the viral  
439 replication. A faster antibody response was mounted in groups A (Benin $\Delta$ DP148R $\Delta$ EP402R), C  
440 (Benin $\Delta$ DP148R $\Delta$ EP153R) and D (Benin $\Delta$ DP148R $\Delta$ EP153R), whereas group B  
441 (Benin $\Delta$ DP148R $\Delta$ EP153R $\Delta$ EP402R) showed a slower antibody response, since the animals  
442 seroconverted only after the second boost (Figure 10). When looking at the cell-mediated immune  
443 responses, PBMCs collected from Group A (Benin $\Delta$ DP148R $\Delta$ EP402R) had higher responses than  
444 Group B (Benin $\Delta$ DP148R $\Delta$ EP402R $\Delta$ EP153R) and Group C (Benin $\Delta$ DP148R $\Delta$ EP153R) before  
445 the boost (Figure 9D). Interestingly, PBMCs from pigs immunized with  
446 Benin $\Delta$ DP148R $\Delta$ EP153R $\Delta$ EP402R only had a considerable response after boost with numbers  
447 increasing before challenge (Figure 9B) and no statistical significance was observed between  
448 Groups A and B at that time (Figure 9D). These results strengthen our hypothesis of a synergistic  
449 effect of deleting EP153R and EP402R genes in reducing viral replication and persistence. This is  
450 supported by the fact that the C-type lectins are reported to be involved in the interaction with  
451 glycans on the cells surface and may facilitate the attachment of the viruses to different cells.

452 After challenge, Group B (Benin $\Delta$ DP148R $\Delta$ EP153R $\Delta$ EP402R) presented moderate  
453 viremia (up to  $10^6$  genome copies/ml) (Figure 7B), with 2 pigs reaching the endpoint, indicating  
454 that the immune response induced was not sufficient to suppress replication of the challenge virus.  
455 As discussed above, possibly Benin $\Delta$ DP148R $\Delta$ EP402R $\Delta$ EP153R did not replicate to the same  
456 extent, as no viremia was detected, and consequently a reduced immune response was induced.  
457 Since all viruses replicated to a similar level as parental virus in macrophages *in vitro*, the reduced  
458 replication *in vivo* probably resulted from interactions with other host cells. Group C  
459 (Benin $\Delta$ DP148R $\Delta$ EP153R) showed a slightly higher viremia level when compared with Group D  
460 (Benin $\Delta$ DP148R) (Figure 8). These differences were observed as early as day 10 post  
461 immunization, suggesting that they were not mediated by specific antibody or T cell responses  
462 against EP153R in animals infected with Benin $\Delta$ DP148R.

463 In summary, we showed that by removing EP402R from the Benin $\Delta$ DP148R backbone we  
464 reduced viral persistence in blood after immunization, reducing clinical signs but maintaining a  
465 survival rate of 100% after challenge and no replication of challenge virus. More importantly, the  
466 additional deletion of EP153R increased attenuation, since no clinical signs or viremia were  
467 observed after immunization, however elevated clinical signs and viremia were observed after  
468 challenge with 75% survival rate. Deletion of EP153R alone did not reduce virus persistence or  
469 clinical signs after immunization compared to the single deletion of DP148R gene. These results  
470 highlight an important role for both EP153R and EP402R proteins in promoting virus replication  
471 *in vivo*. This may be mediated by the cooperation of both proteins in binding of virus particles and  
472 infected cells to red blood cells. In addition, the two proteins may also act singly or synergistically  
473 to evade initial steps of the immune response and a role in immune modulation has already been  
474 shown for the EP402R protein. C-type lectin proteins have diverse roles in mediating cell to cell  
475 adhesion. For example, C-type lectin receptors play a crucial role in Natural Killer (NK) cell  
476 activity. It is tempting to speculate that EP153R may have evolved to evade NK host immune  
477 responses since NK activity was shown to correlate with protection following immunization with  
478 the attenuated NH/P68 isolate (40).

479 Overall, the viruses we have constructed from already attenuated virus provide the means  
480 to dissect the role of these and other viral proteins in pathogenesis and evasion of immune  
481 responses.

482

### 483 **Acknowledgements**

484 We are grateful to Animal Services at Pirbright for help with animal experiments and members of  
485 the ASFV team for helpful discussions.

### 486 **Funding**

487 This research was funded by Biotechnology and Biological Sciences Research Council, Grant  
488 Number: BBS/E/I/00007039/ 7031/ 7034. Some parts of the quoted research were funded in part  
489 supported by the Pirbright flow cytometry and sequencing facilities. Parts of the studies the Bill &  
490 Melinda Gates Foundation and with United Kingdom (UK) and FCDO from the UK Government  
491 through Global Alliance for Livestock Veterinary Medicines (GALVmed) (grant number  
492 OPP1009497). The findings and conclusions contained within are those of the authors and do not

493 necessarily reflect positions or policies of the Bill & Melinda Gates Foundation or the UK  
494 Government or FCDO.

495

## 496 **References**

497

- 498 1. Mulumba-Mfumum LK, Saegerman C, Dixon LK, Madimba KC, Kazadi E, Mukalakata NT, Oura CAL,  
499 Chenais E, Masembe C, Ståhl K, Thiry E, Penrith ML. 2019. African swine fever: Update on  
500 Eastern, Central and Southern Africa. *Transboundary and Emerging Diseases* 66:1462-1480.
- 501 2. Netherton CL, Connell S, Benfield CTO, Dixon LK. 2019. The Genetics of Life and Death: Virus-  
502 Host Interactions Underpinning Resistance to African Swine Fever, a Viral Hemorrhagic Disease.  
503 *Frontiers in Genetics* 10.
- 504 3. Alonso C, Borca M, Dixon L, Revilla Y, Rodriguez F, Escribano JM, Consortium IR. 2018. ICTV Virus  
505 Taxonomy Profile: Asfarviridae. *Journal of General Virology* 99:613-614.
- 506 4. Dixon LK, Islam M, Nash R, Reis AL. 2019. African swine fever virus evasion of host defences.  
507 *Virus Research* 266:25-33.
- 508 5. Afonso C, Piccone M, Zaffuto K, Neilan J, Kutish G, Lu Z, Balinsky C, Gibb T, Bean T, Zsak L. 2004.  
509 African swine fever virus multigene family 360 and 530 genes affect host interferon response.  
510 *Journal of virology* 78:1858-1864.
- 511 6. Reis AL, Abrams CC, Goatley LC, Netherton C, Chapman DG, Sanchez-Cordon P, Dixon LK. 2016.  
512 Deletion of African swine fever virus interferon inhibitors from the genome of a virulent isolate  
513 reduces virulence in domestic pigs and induces a protective response. *Vaccine* 34:4698-4705.
- 514 7. Reis AL, Goatley LC, Jabbar T, Sanchez-Cordon PJ, Netherton CL, Chapman DAG, Dixon LK. 2017.  
515 Deletion of the African Swine Fever Virus Gene DP148R Does Not Reduce Virus Replication in  
516 Culture but Reduces Virus Virulence in Pigs and Induces High Levels of Protection against  
517 Challenge. *Journal of Virology* 91:e01428-17.
- 518 8. O'Donnell V, Holinka LG, Gladue DP, Sanford B, Krug PW, Lu X, Arzt J, Reese B, Carrillo C, Risatti  
519 GR. 2015. African swine fever virus Georgia isolate harboring deletions of MGF360 and MGF505  
520 genes is attenuated in swine and confers protection against challenge with virulent parental  
521 virus. *Journal of virology* 89:6048-6056.
- 522 9. Zsak L, Caler E, Lu Z, Kutish GF, Neilan JG, Rock DL. 1998. A nonessential African swine fever virus  
523 gene UK is a significant virulence determinant in domestic swine. *Journal of virology* 72:1028-  
524 1035.
- 525 10. Wang X, Wu J, Wu Y, Chen H, Zhang S, Li J, Xin T, Jia H, Hou S, Jiang Y, Zhu H, Guo X. 2018.  
526 Inhibition of cGAS-STING-TBK1 signaling pathway by DP96R of ASFV China 2018/1. *Biochemical  
527 and Biophysical Research Communications* 506:437-443.
- 528 11. Gallardo C, Sánchez EG, Pérez-Núñez D, Nogal M, de León P, Carrascosa ÁL, Nieto R, Soler A,  
529 Arias ML, Revilla Y. 2018. African swine fever virus (ASFV) protection mediated by NH/P68 and  
530 NH/P68 recombinant live-attenuated viruses. *Vaccine* 36:2694-2704.
- 531 12. Borca MV, O'Donnell V, Holinka LG, Risatti GR, Ramirez-Medina E, Vuono EA, Shi J, Pruitt S, Rai  
532 A, Silva E, Velazquez-Salinas L, Gladue DP. 2020. Deletion of CD2-like gene from the genome of  
533 African swine fever virus strain Georgia does not attenuate virulence in swine. *Scientific Reports*  
534 10:494.
- 535 13. Rodríguez JM, Yáñez RJ, Almazán F, Viñuela E, Rodríguez JF. 1993. African swine fever virus  
536 encodes a CD2 homolog responsible for the adhesion of erythrocytes to infected cells. *Journal of  
537 Virology* 67:5312-5320.

- 538 14. Borca MV, Kutish GF, Afonso CL, Irusta P, Carrillo C, Brun A, Sussman M, Rock DL. 1994. An  
539 African Swine Fever Virus Gene with Similarity to the T-Lymphocyte Surface Antigen CD2  
540 Mediates Hemadsorption. *Virology* 199:463-468.
- 541 15. Quintero J, Wesley R, Whyard T, Gregg D, Mebus C. 1986. In vitro and in vivo association of  
542 African swine fever virus with swine erythrocytes. *American journal of veterinary research*  
543 47:1125-1131.
- 544 16. Borca MV, Carrillo C, Zsak L, Laegreid WW, Kutish GF, Neilan JG, Burrage TG, Rock DL. 1998.  
545 Deletion of a CD2-Like Gene, <em>8-DR</em>, from African Swine Fever Virus Affects Viral  
546 Infection in Domestic Swine. *Journal of Virology* 72:2881-2889.
- 547 17. Kay-Jackson PC, Goatley LC, Cox L, Miskin JE, Parkhouse RME, Wienands J, Dixon LK. 2004. The  
548 CD2v protein of African swine fever virus interacts with the actin-binding adaptor protein  
549 SH3P7. *Journal of General Virology* 85:119-130.
- 550 18. Pérez-Núñez D, García-Urdiales E, Martínez-Bonet M, Nogal ML, Barroso S, Revilla Y, Madrid R.  
551 2015. CD2v Interacts with Adaptor Protein AP-1 during African Swine Fever Infection. *PLOS ONE*  
552 10:e0123714.
- 553 19. Alejo A, Matamoros T, Guerra M, Andrés G. 2018. A Proteomic Atlas of the African Swine Fever  
554 Virus Particle. *Journal of Virology* 92:e01293-18.
- 555 20. Argilaguet JM, Pérez-Martín E, Nofrarías M, Gallardo C, Accensi F, Lacasta A, Mora M, Ballester  
556 M, Galindo-Cardiel I, López-Soria S, Escribano JM, Reche PA, Rodríguez F. 2012. DNA Vaccination  
557 Partially Protects against African Swine Fever Virus Lethal Challenge in the Absence of  
558 Antibodies. *PLOS ONE* 7:e40942.
- 559 21. Burmakina G, Malogolovkin A, Tulman ER, Xu W, Delhon G, Kolbasov D, Rock DL. 2019.  
560 Identification of T-cell epitopes in African swine fever virus CD2v and C-type lectin proteins.  
561 *Journal of General Virology* 100:259-265.
- 562 22. Bermejo-Jambrina M, Eder J, Helgers LC, Hertoghs N, Nijmeijer BM, Stunnenberg M, Geijtenbeek  
563 TBH. 2018. C-Type Lectin Receptors in Antiviral Immunity and Viral Escape. *Frontiers in*  
564 *Immunology* 9.
- 565 23. Galindo I, Almazán F, Bustos MJ, Viñuela E, Carrascosa AL. 2000. African Swine Fever Virus  
566 EP153R Open Reading Frame Encodes a Glycoprotein Involved in the Hemadsorption of Infected  
567 Cells. *Virology* 266:340-351.
- 568 24. Hurtado C, Bustos MJ, Granja AG, de León P, Sabina P, López-Viñas E, Gómez-Puertas P, Revilla  
569 Y, Carrascosa AL. 2011. The African swine fever virus lectin EP153R modulates the surface  
570 membrane expression of MHC class I antigens. *Archives of Virology* 156:219-234.
- 571 25. Hurtado C, Granja AG, Bustos MaJ, Nogal MaL, González de Buitrago G, de Yébenes VG, Salas  
572 MaL, Revilla Y, Carrascosa AL. 2004. The C-type lectin homologue gene (EP153R) of African swine  
573 fever virus inhibits apoptosis both in virus infection and in heterologous expression. *Virology*  
574 326:160-170.
- 575 26. Chapman DAG, Tcherepanov V, Upton C, Dixon LK. 2008. Comparison of the genome sequences  
576 of non-pathogenic and pathogenic African swine fever virus isolates. *Journal of General Virology*  
577 89:397-408.
- 578 27. Abrams CC, Dixon LK. 2012. Sequential deletion of genes from the African swine fever virus  
579 genome using the cre/loxP recombination system. *Virology* 433:142-148.
- 580 28. Shaner NC, Lin MZ, McKeown MR, Steinbach PA, Hazelwood KL, Davidson MW, Tsien RY. 2008.  
581 Improving the photostability of bright monomeric orange and red fluorescent proteins. *Nature*  
582 *Methods* 5:545-551.
- 583 29. Portugal RS, Bauer A, Keil GM. 2017. Selection of differently temporally regulated African swine  
584 fever virus promoters with variable expression activities and their application for transient and  
585 recombinant virus mediated gene expression. *Virology* 508:70-80.

- 586 30. Almazán F, Rodríguez JM, Andrés G, Pérez R, Viñuela E, Rodríguez JF. 1992. Transcriptional  
587 analysis of multigene family 110 of African swine fever virus. *Journal of virology* 66:6655-6667.
- 588 31. Rathakrishnan A, Moffat K, Reis AL, Dixon LK. 2020. Production of Recombinant African Swine  
589 Fever Viruses: Speeding Up the Process. *Viruses* 12:615.
- 590 32. King DP, Reid SM, Hutchings GH, Grierson SS, Wilkinson PJ, Dixon LK, Bastos ADS, Drew TW.  
591 2003. Development of a TaqMan® PCR assay with internal amplification control for the  
592 detection of African swine fever virus. *Journal of Virological Methods* 107:53-61.
- 593 33. Cackett G, Matelska D, Sýkora M, Portugal R, Malecki M, Bähler J, Dixon L, Werner F. 2020. The  
594 African Swine Fever Virus Transcriptome. *Journal of Virology* 94:e00119-20.
- 595 34. King K, Chapman D, Argilaguet JM, Fishbourne E, Hutet E, Cariolet R, Hutchings G, Oura CAL,  
596 Netherton CL, Moffat K, Taylor G, Le Potier M-F, Dixon LK, Takamatsu H-H. 2011. Protection of  
597 European domestic pigs from virulent African isolates of African swine fever virus by  
598 experimental immunisation. *Vaccine* 29:4593-4600.
- 599 35. Rowlands RJ, Duarte MM, Boinas F, Hutchings G, Dixon LK. 2009. The CD2v protein enhances  
600 African swine fever virus replication in the tick vector, *Ornithodoros erraticus*. *Virology* 393:319-  
601 328.
- 602 36. Monteagudo PL, Lacasta A, López E, Bosch L, Collado J, Pina-Pedrero S, Correa-Fiz F, Accensi F,  
603 Navas MJ, Vidal E, Bustos MJ, Rodríguez JM, Gallei A, Nikolin V, Salas ML, Rodríguez F. 2017.  
604 BA71ΔCD2: a New Recombinant Live Attenuated African Swine Fever Virus with Cross-Protective  
605 Capabilities. *Journal of Virology* 91:e01058-17.
- 606 37. Teklue T, Wang T, Luo Y, Hu R, Sun Y, Qiu H-J. 2020. Generation and Evaluation of an African  
607 Swine Fever Virus Mutant with Deletion of the CD2v and UK Genes. *Vaccines* 8:763.
- 608 38. Neilan JG, Borca MV, Lu Z, Kutish GF, Kleiboeker SB, Carrillo C, Zsak L, Rock DL. 1999. An African  
609 swine fever virus ORF with similarity to C-type lectins is non-essential for growth in swine  
610 macrophages in vitro and for virus virulence in domestic swine The EMBL/GenBank accession  
611 numbers of sequences reported in this paper are AF017027 (Chiredzi/83/1), AF017028  
612 (Crocodile/96/1), AF017029 (Crocodile/96/3), AF017030 (E70), AF017031 (E75) AF017032 (Haiti  
613 811), AF017033 (Fairfield/96/1), AF017034 (Wildebesslaagte/96/1), AF017035 (Malawi Lil20/1),  
614 AF017036 (Pretoriuskop/96/4), AF017037 (Pretoriuskop/96/5), AF017038 (Tengani) and  
615 AF017039 (Uganda '61). *Journal of General Virology* 80:2693-2697.
- 616 39. Portugal R, Leitão A, Martins C. 2009. Characterization of African swine fever virus IAP  
617 homologue expression in porcine macrophages infected with different virulence isolates.  
618 *Veterinary Microbiology* 139:140-146.
- 619 40. Leitão A, Cartaxeiro C, Coelho R, Cruz B, Parkhouse RME, Portugal FC, Vigário JD, Martins CLV.  
620 2001. The non-haemadsorbing African swine fever virus isolate ASFV/NH/P68 provides a model  
621 for defining the protective anti-virus immune response. *Journal of General Virology* 82:513-523.
- 622 41. Gladue DP, O'Donnell V, Ramirez-Medina E, Rai A, Pruitt S, Vuono EA, Silva E, Velazquez-Salinas  
623 L, Borca MV. 2020. Deletion of CD2-Like (CD2v) and C-Type Lectin-Like (EP153R) Genes from  
624 African Swine Fever Virus Georgia-Δ9GL Abrogates Its Effectiveness as an Experimental Vaccine.  
625 *Viruses* 12:1185.
- 626 42. Malogolovkin A, Burmakina G, Tulman ER, Delhon G, Diel DG, Salnikov N, Kutish GF, Kolbasov D,  
627 Rock DL. 2015. African swine fever virus CD2v and C-type lectin gene loci mediate serological  
628 specificity. *Journal of General Virology* 96:866-873.
- 629 43. Burmakina G, Malogolovkin A, Tulman ER, Zsak L, Delhon G, Diel DG, Shobogorov NM,  
630 Morgunov YP, Morgunov SY, Kutish GF, Kolbasov D, Rock DL. 2016. African swine fever virus  
631 serotype-specific proteins are significant protective antigens for African swine fever. *Journal of*  
632 *General Virology* 97:1670-1675.



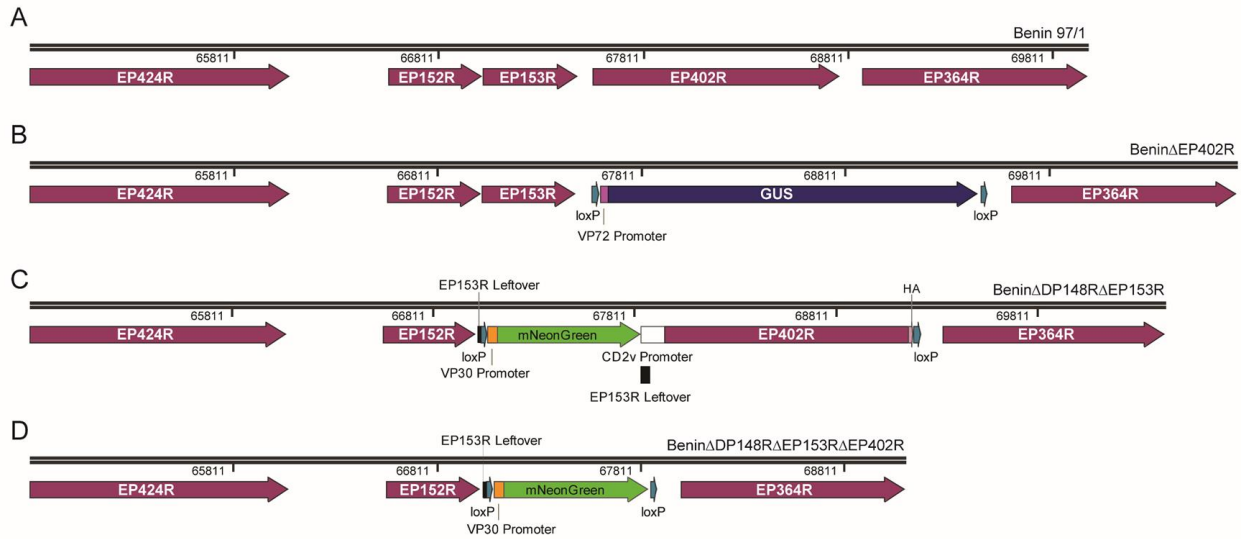

**Figure 1. Schematic diagram depicting the deletion of EP153R and/or EP402R genes from genotype I ASFV.** EP402R was deleted by homologous recombination between transfer plasmid pΔEP402R-VP72GUS and parental Benin 97/1 isolate (**A**) and the resultant, BeninΔEP402R (**B**), was purified using limiting dilutions. Using a sequential deletion method, DP148R was then further deleted to produce BeninΔDP148RΔEP402R via single cell isolation, combined with limiting dilutions. With a previously described BeninΔDP148R, EP153R was deleted by homologous recombination to produce BeninΔDP148RΔEP153R (**C**), which contains mNeonGreen reporter marker. Likewise, using BeninΔDP148R as the parental virus, a triple gene deleted virus, BeninΔDP148RΔEP153RΔEP402R (**D**) was produced. Both recombinant viruses were isolated and purified using FACS and limiting dilutions.

633  
 634  
 635  
 636  
 637  
 638  
 639  
 640  
 641  
 642  
 643  
 644  
 645  
 646  
 647  
 648



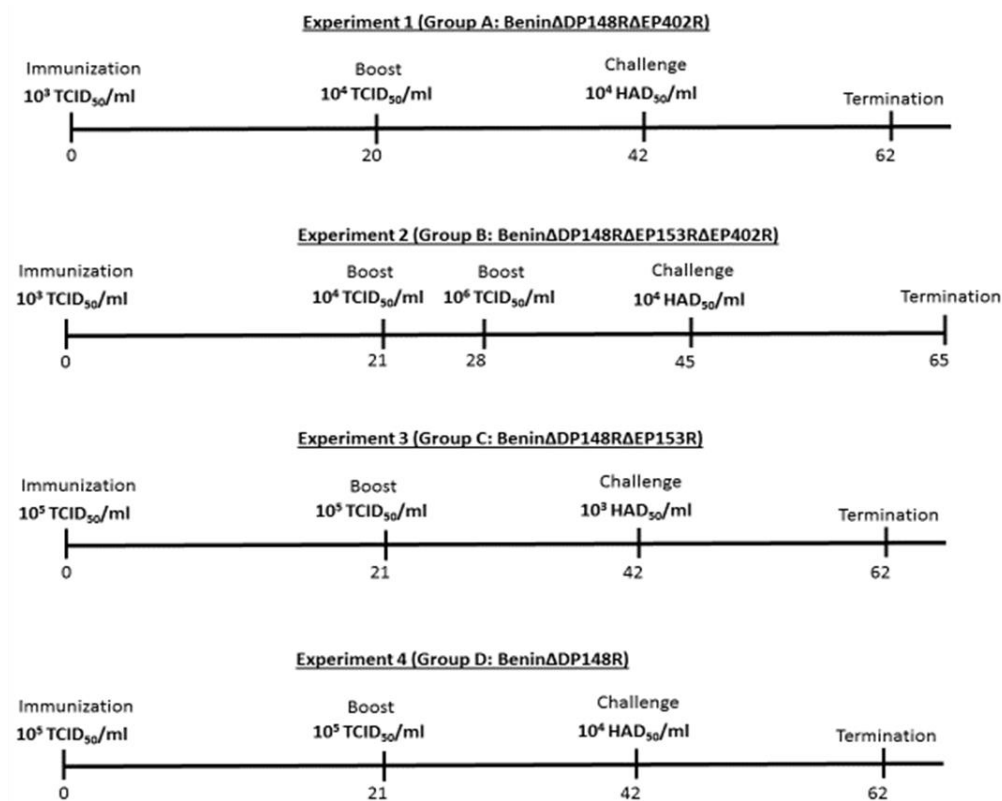

**Figure 2. Timeline for the vaccination experiments.** The days are given as post-immunization, beginning at day 0 with immunization, followed by boost, challenge with Benin 97/1 and finally termination. The amount of viruses used is given as either TCID<sub>50</sub>/mL or HAD<sub>50</sub>/mL

649  
650  
651  
652  
653  
654  
655  
656  
657  
658  
659  
660  
661

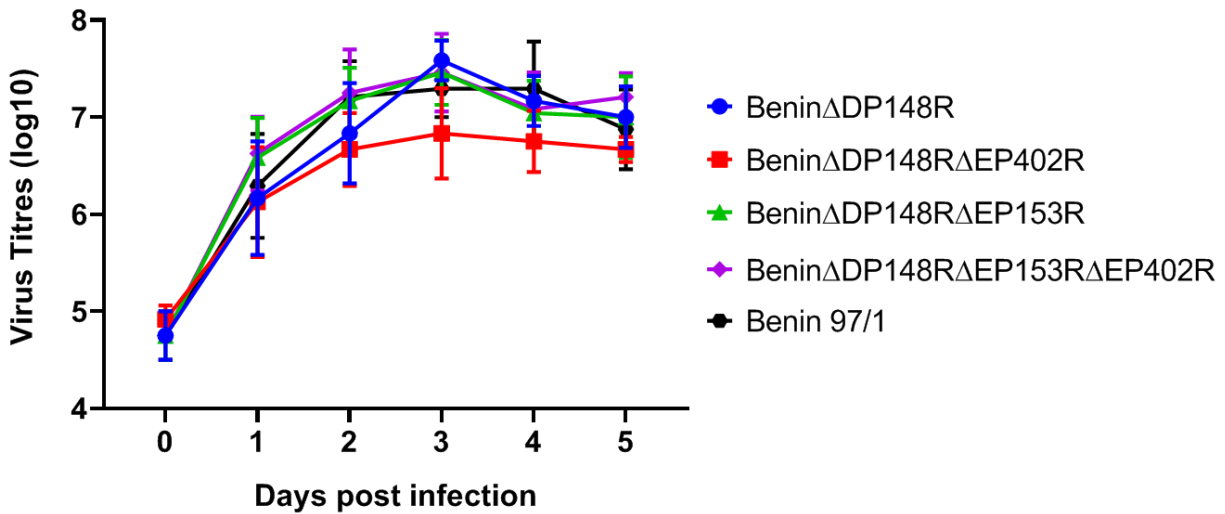

662

663

664 **Figure 3. Replication of the recombinant gene deleted ASFV viruses compared to the**  
665 **wildtype Benin 97/1 strain.** Purified PBMs from 2 different pigs were infected with viruses at  
666 MOI 0.01 in triplicates. Viruses were harvested from both cells and supernatants at different time  
667 points and titrated on PBMs in quadruplicates. Virus titres are presented as log<sub>10</sub> HAD<sub>50</sub>/ml or  
668 TCID<sub>50</sub>/ml.

669

670

671

672

673

674

675

676

677

678

679

680

681

682

683

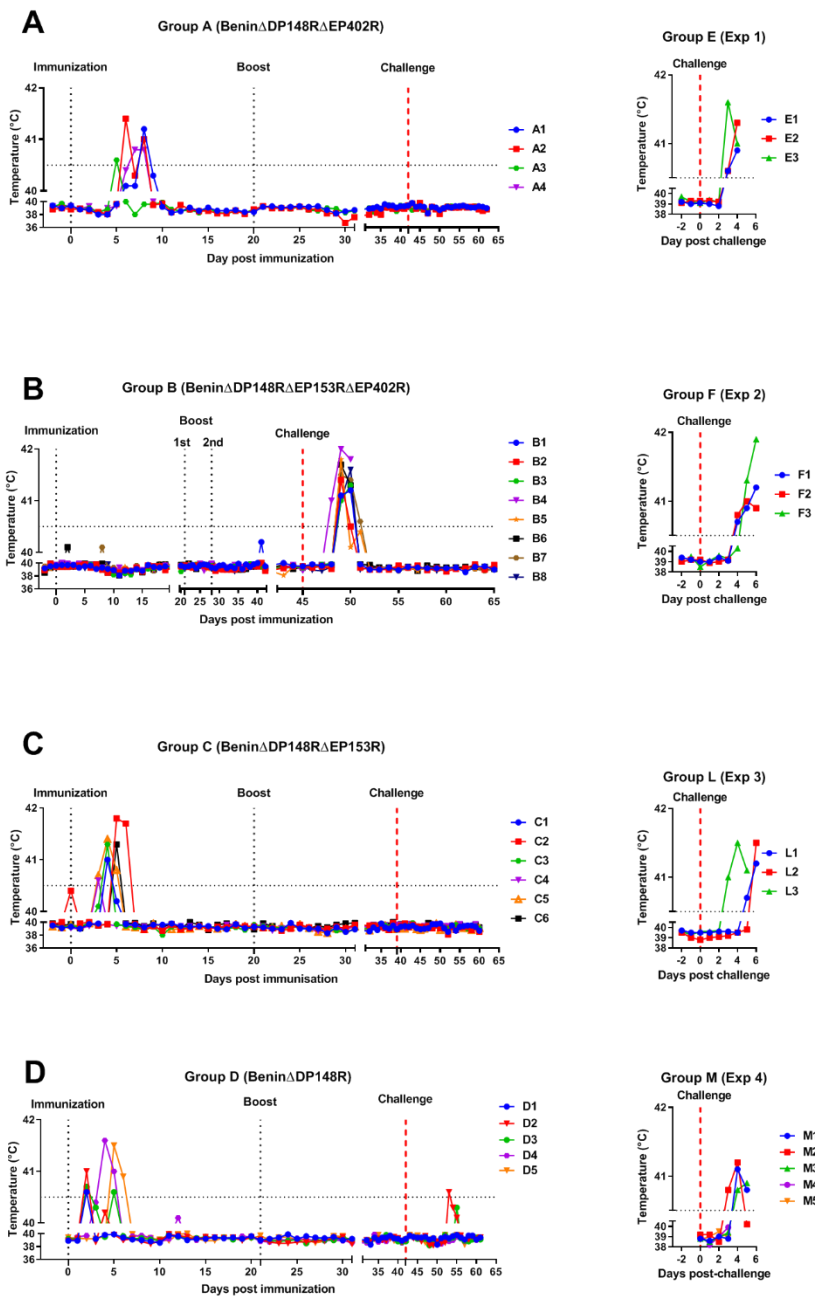

684

685 **Figure 4.** Temperatures following immunization and boost of pigs with  
686 Benin $\Delta$ DP148R $\Delta$ EP402R (Group A), Benin $\Delta$ DP148R $\Delta$ EP402R $\Delta$ EP153R (Group B),  
687 Benin $\Delta$ DP148R $\Delta$ EP153R (Group C) and with Benin $\Delta$ DP148R (Group D) and challenge with  
688 Benin 97/1. Temperatures for non-immune control pigs after challenge (Group E, Group F,  
689 Group L and Group M).

690

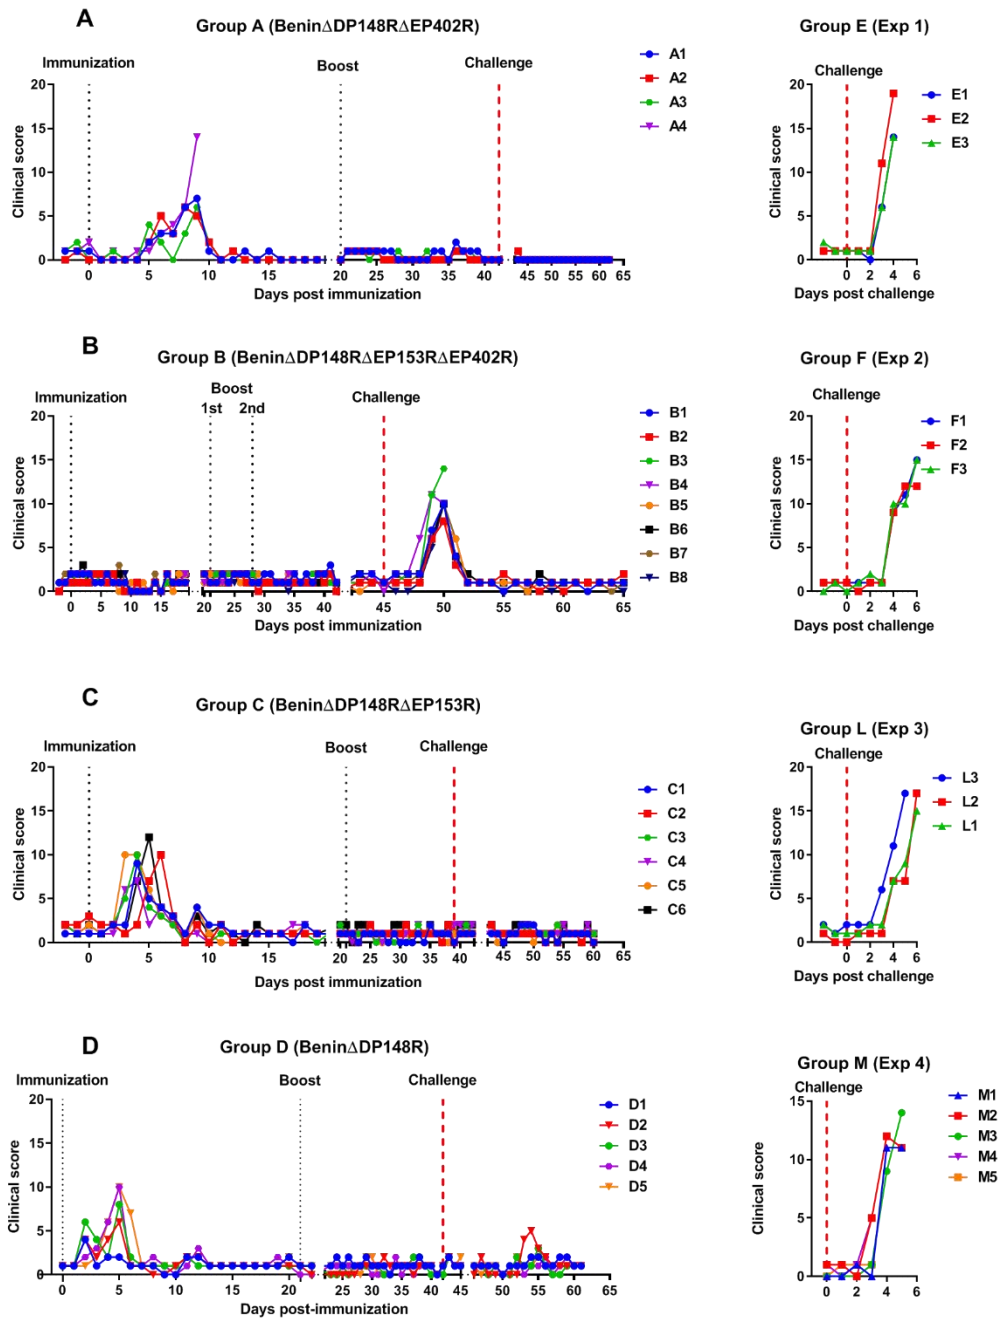

691

692 **Figure 5.** Clinical scores following immunization and boost of pigs with  
693 Benin $\Delta$ DP148R $\Delta$ EP402R (Group A), Benin $\Delta$ DP148R $\Delta$ EP402R $\Delta$ EP153R (Group B),  
694 Benin $\Delta$ DP148R $\Delta$ EP153R (Group C) and with Benin $\Delta$ DP148R (Group D) and challenge with  
695 Benin 97/1. Scores for non-immune control pigs after challenge (Group E, Group F, Group L and  
696 Group M).

697

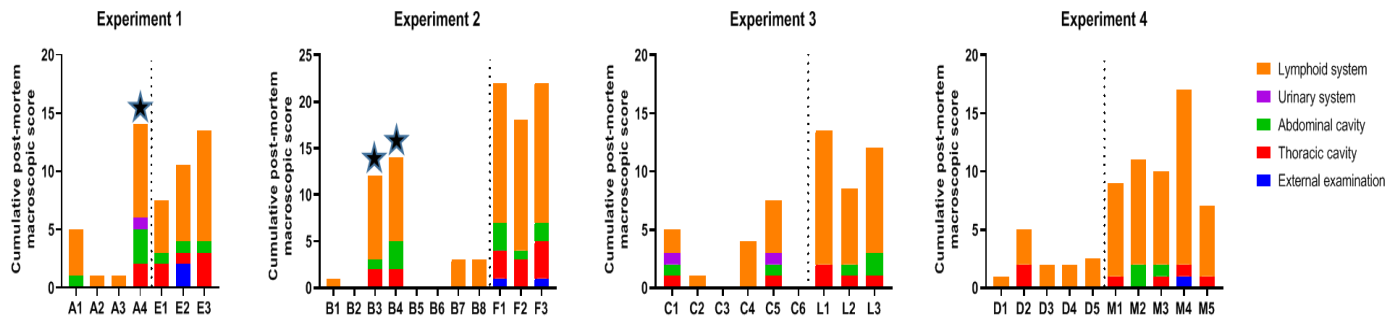

698

699 **Figure 6.** Scoring macroscopic lesions at the cull point for the vaccinated groups: Experiment 1,  
700 Benin $\Delta$ DP148R $\Delta$ EP402R (Group A), Experiment 2, Benin $\Delta$ DP148R $\Delta$ EP402R $\Delta$ EP153R (Group  
701 B), Experiment 3, Benin $\Delta$ DP148R $\Delta$ EP153R (Group C) and Experiment 4, Benin $\Delta$ DP148R  
702 (Group D) and the control groups (E, F, L and M). Lesions are presented on the graph by  
703 different colours. Stars represent the animals that reached the end-point before study termination.

704

705

706

707

708

709

710

711

712

713

714

715

716

717

718

719

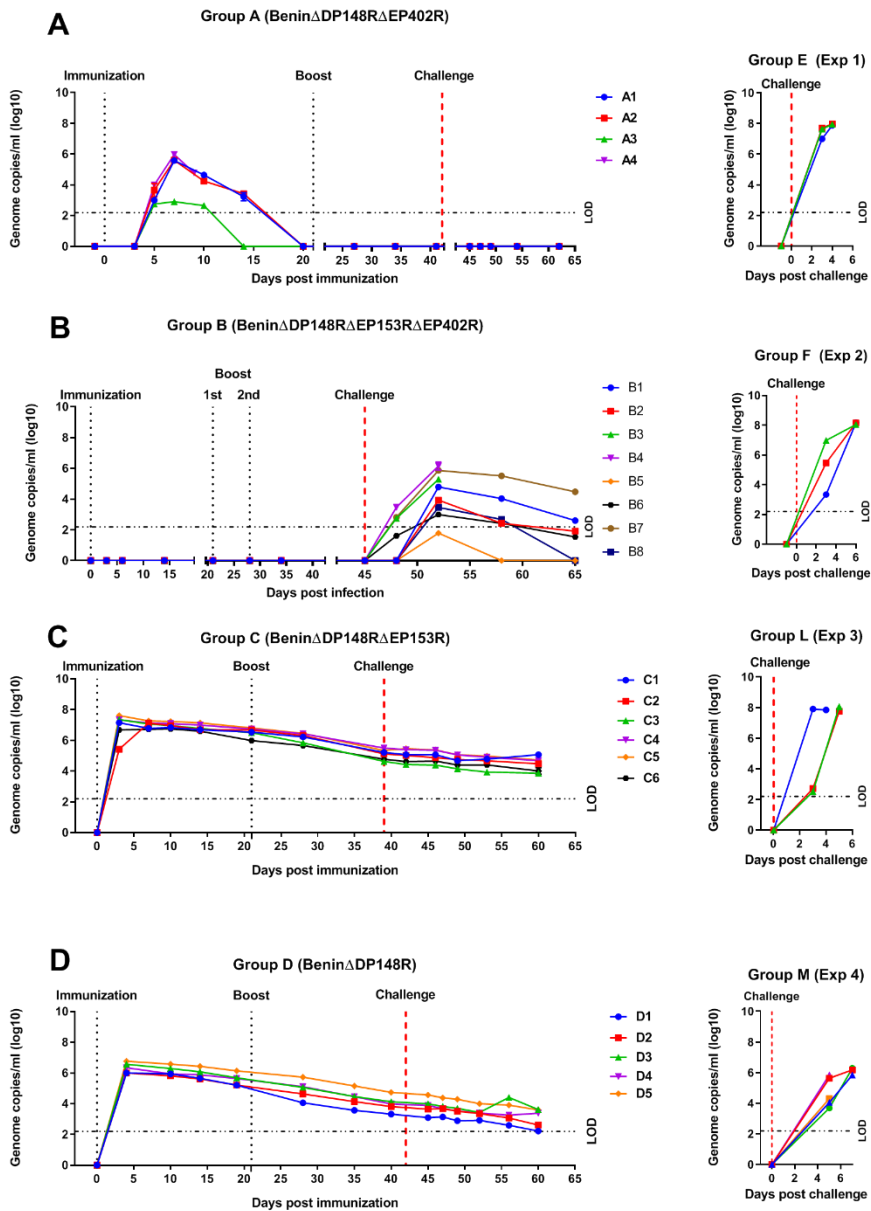

720

721 **Figure 7.** Levels of viral genome in blood of pigs immunized with Benin $\Delta$ DP148R $\Delta$ EP402R  
722 (Group A), Benin $\Delta$ DP148R $\Delta$ EP402R $\Delta$ EP153R (Group B), Benin $\Delta$ DP148R $\Delta$ EP153R (Group  
723 C), Benin $\Delta$ DP148R (Group D). Levels of control groups corresponding to each study are  
724 presented in the right panels (Groups E, F, L, M). Results are estimated by qPCR and reported as  
725 genomic copies/ml (log<sub>10</sub>) of blood. Dashed line represents the limit of detection (LOD) of the  
726 assay.



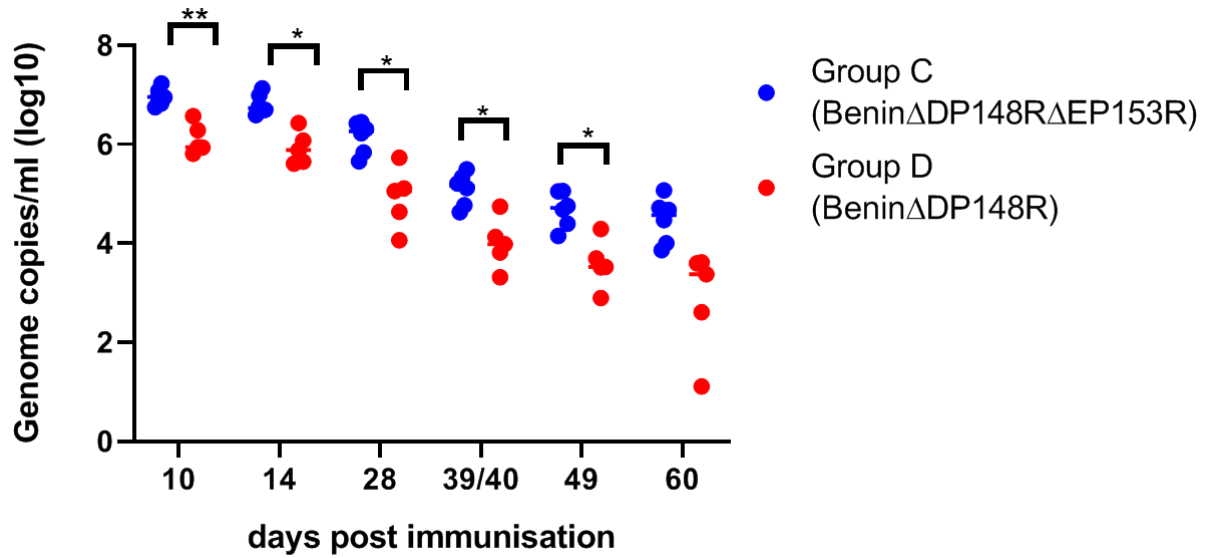

727

728

729 **Figure 8.** Levels of viral genome in blood of pigs immunized with BeninΔDP148RΔEP153R  
730 (Group C) and BeninΔDP148R (Group D). Statistically significant responses between groups are  
731 presented (\*\* is p<0.01; \* is p<0.1)

732

733

734

735

736

737

738

739

740

741

742

743

744

745

746

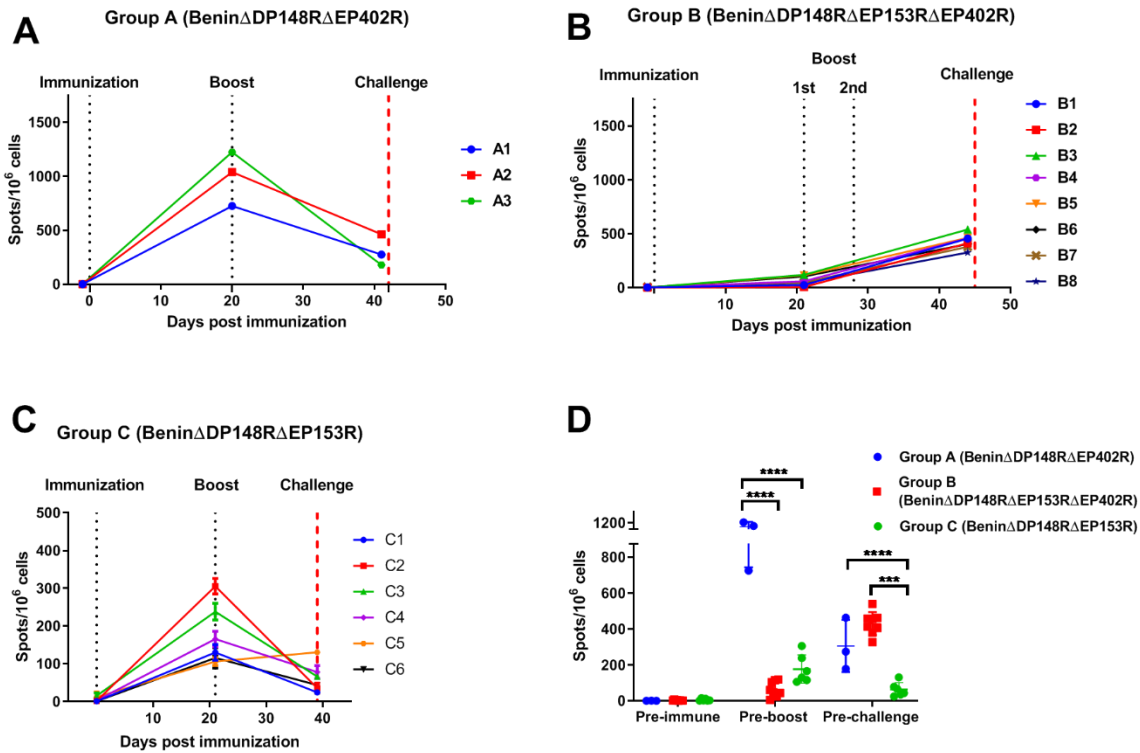

747

748

749 **Figure 9.** IFN $\gamma$  responses from PBMCs collected post immunization, post boost and before  
 750 challenge. Panels A and B show the number of IFN $\gamma$  secreting cells stimulated with Benin 97/1  
 751 by ELISPOT assay. PBMCs were collected from pigs immunized with Benin $\Delta$ DP148R $\Delta$ EP402R  
 752 (Group A), Benin $\Delta$ DP148R $\Delta$ EP402R $\Delta$ EP153R (Group B), and Benin $\Delta$ DP148R $\Delta$ EP153R  
 753 (Group C). Results are presented as mean number of IFN $\gamma$  producing cells/ $10^6$  cells.  
 754 Statistically significant responses between groups pre-boost and pre-challenge are presented in  
 755 Panel D (\*\*\*\* is p<0.0001; \*\*\* is p<0.001).

756

757

758

759

760

761

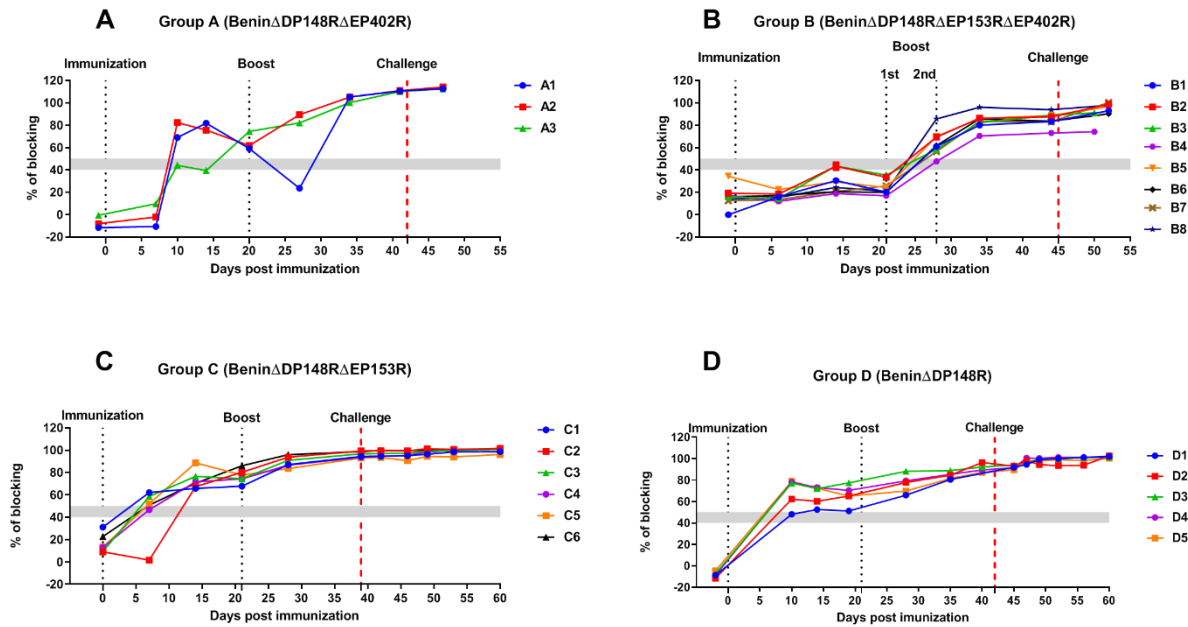

762

763

764 **Figure 10.** Antibody responses post immunization. Serum samples were collected from pigs  
765 immunized with Benin $\Delta$ DP148R $\Delta$ EP402R (Group A), Benin $\Delta$ DP148R $\Delta$ EP402R $\Delta$ EP153R  
766 (Group B), Benin $\Delta$ DP148R $\Delta$ EP153R (Group C) and Benin $\Delta$ DP148R (Group D) and assayed  
767 using a commercial blocking ELISA against p72 protein. Results are presented as percentage of  
768 blocking and cut-off value is represented by 50%.
